# Supplementary material
Source: Royal Society of Chemistry journal article supplement (doi:10.1039/d6cp00765a)
Supplement: d6cp00765a2.pdf [file d6cp00765a2.pdf]

## Supplement Information

### Design Strategy for TATB-like Insensitive High Explosives: Rational Design and High-Throughput Screening Based on Fused-Ring Frameworks

Zujia Lu<sup>a</sup>, Tingwei Wang<sup>b</sup>, Cong Li<sup>a</sup>, Chao Zhang<sup>a</sup>, Qiyao Yu<sup>a\*</sup>, Jianguo Zhang<sup>a\*</sup>

<sup>a</sup> State Key Laboratory of Explosion Science and Technology, Beijing Institute of Technology, Beijing 100081, China.

<sup>b</sup> China Aerospace Science and Technology Corporation, Beijing, 100048, China.

E-mail: [zjgbit@bit.edu.cn](mailto:zjgbit@bit.edu.cn); [qiyaoyu@bit.edu.cn](mailto:qiyaoyu@bit.edu.cn)

### Calculation of enthalpy of formation using the definition method

The enthalpy change of producing one mole of a compound from its simple substances in their standard states is defined as the standard molar enthalpy of formation of the compound. Taking the compound  $C_aH_bN_cO_d$  as an example, the corresponding general equation for its formation reaction is as follows:

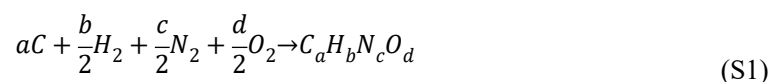

By definition, the enthalpy of formation is the reaction enthalpy of the above **Equation S1**. The enthalpy of reaction is determined by calculating the difference between the enthalpy of the products and the enthalpy of the reactants. To calculate the enthalpy of each species involved in the reaction, quantum chemistry computational programs such as Gaussian or ORCA can be used. Carbon is a solid at room temperature, but the enthalpy value obtained from quantum chemistry computational programs corresponds

to its formation in the gaseous state. Subtracting the sublimation enthalpy ( $H_{sub}(C)$ ) from the enthalpy value ( $H(C)$ ) obtained from quantum chemistry computational programs is necessary to determine the enthalpy of carbon in its stable phase (solid).

In summary, the formula for calculating the enthalpy of formation using the definition method is as follows:

$$\Delta_f H_m^\theta = \Delta_r H_m^\theta = H(C_a H_b N_c O_d) - a[H(C) - H_{sub}(C)] - \frac{b}{2}H(H_2) - \frac{c}{2}H(N_2) - \frac{d}{2}H(O_2) \quad (S2)$$

The enthalpy values above correspond to the stable phase at 298 K. As such, the calculated enthalpy of formation is also determined at this temperature.

Table S1 SYBA Score of classic explosives

| Explosives | SMILES                                                                                                              | SYBA |
|------------|---------------------------------------------------------------------------------------------------------------------|------|
| RDX        | <chem>O=[N+](=[O-])N1CN([N+](=O)[O-])CN([N+](=O)[O-])C1</chem>                                                      | 2.1  |
| HMX        | <chem>O=[N+](=[O-])N1CN([N+](=O)[O-])CN([N+](=O)[O-])CN([N+](=O)[O-])C1</chem>                                      | 2.1  |
| FOX-7      | <chem>NC(N)=C([N+](=O)[O-])[N+](=O)[O-]</chem>                                                                      | 5.7  |
| CL-20      | <chem>O=[N+](=[O-])N1C2C3N([N+](=O)[O-])C1C1N([N+](=O)[O-])C(C(N1[N+](=O)[O-])N3[N+](=O)[O-])N2[N+](=O)[O-]</chem>  | 1.3  |
| PETN       | <chem>O=[N+](=[O-])OCC(CO[N+](=O)[O-])(CO[N+](=O)[O-])CO[N+](=O)[O-]</chem>                                         | 15.0 |
| HNS        | <chem>O=[N+](=[O-])c1cc([N+](=O)[O-])c(C=Cc2c([N+](=O)[O-])cc([N+](=O)[O-])cc2[N+](=O)[O-])c([N+](=O)[O-])c1</chem> | 22.9 |
| TNT        | <chem>Cc1c([N+](=O)[O-])cc([N+](=O)[O-])cc1[N+](=O)[O-]</chem>                                                      | 34.5 |
| DNAN       | <chem>COc1ccc([N+](=O)[O-])cc1[N+](=O)[O-]</chem>                                                                   | 54.4 |
| TATB       | <chem>Nc1c([N+](=O)[O-])c(N)c([N+](=O)[O-])c(N)c1[N+](=O)[O-]</chem>                                                | 11.8 |
| DATB       | <chem>Nc1c([N+](=O)[O-])cc([N+](=O)[O-])c(N)c1[N+](=O)[O-]</chem>                                                   | 19.5 |
| LLM-105    | <chem>Nc1c([N+](=O)[O-])nc([N+](=O)[O-])c(N)[n+]1[O-]</chem>                                                        | 14.2 |
| ANPZ       | <chem>Nc1nc(N)c([N+](=O)[O-])nc1[N+](=O)[O-]</chem>                                                                 | 12.9 |
| BITE-101   | <chem>Nc1[n+](=[O-])nc2c([N+](=O)[O-])c([N+](=O)[O-])nn12</chem>                                                    | 17.5 |
| PTX        | <chem>Nc1c([N+](=O)[O-])nnc2c([N+](=O)[O-])c([N+](=O)[O-])nn12</chem>                                               | 17.8 |
| NAPTO      | <chem>[N-]=[N+]=Nc1n[n+](=[O-])nc2c([N+](=O)[O-])n[nH]c12</chem>                                                    | 16.5 |
| ICM-103    | <chem>[N-]=[N+]=Nc1n[n+](=[O-])nc2[nH]nc([N+](=O)[O-])c12</chem>                                                    | 18.2 |
| ICM-104    | <chem>Nc1nc(N)n2nc([N+](=O)[O-])c([N+](=O)[O-])c2n1</chem>                                                          | 20.3 |

Table S2 USPEX parameter settings

| Parameter Category     | Parameter Name        | Parameter Value                        | Description / Explanation                                                              |
|------------------------|-----------------------|----------------------------------------|----------------------------------------------------------------------------------------|
| Optimization Goal      | optType               | Enthalpy                               | Searching for the most stable structure with the lowest energy.                        |
| System Settings        | numSpecies            | 4                                      | Number of chemical species (Z).                                                        |
| Population Parameters  | populationSize        | 20                                     | Population size                                                                        |
|                        | initialPopSize        | 20                                     | Initial population size                                                                |
|                        | numGenerations        | 20                                     | Maximum generations for the evolutionary algorithm.                                    |
| Stopping Criterion     | stopCrit              | 10                                     | Calculation stops if no new, better structure is found for 10 consecutive generations. |
| Variation Operators    | fracGene              | 0.20                                   | Heredity (Crossover).                                                                  |
|                        | fracRand              | 0.30                                   | Random structure generation.                                                           |
|                        | fracAtomsMut          | 0.10                                   | Atom displacement mutation.                                                            |
|                        | fracRotMut            | 0.10                                   | Lattice rotation mutation.                                                             |
|                        | fracPerm              | 0.10                                   | Permutation (atom swap).                                                               |
|                        | fracLatMut            | 0.10                                   | Lattice mutation.                                                                      |
|                        | fracTopRand           | 0.10                                   | Topology randomization.                                                                |
|                        | mutationDegree        | 4.00                                   | Degree/strength of mutation.                                                           |
|                        | DisplaceInLatmutation | 4.00                                   | Intra-lattice displacement mutation degree.                                            |
| Geometric Constraints  | symmetries            | 14, 2, 19, 15, 4, 61, 29, 33, 7, 9, 62 | Allowed list of space group numbers.                                                   |
| Calculation Interface  | abinitioCode          | 7                                      | Corresponds to the CP2K software.                                                      |
| Calculation Conditions | ExternalPressure      | 0                                      | Structural optimization is performed at zero external pressure.                        |

Table S3 CP2K input file parameter settings

| Parameter Category   | Parameter Name     | Parameter Value | Description                                                              |
|----------------------|--------------------|-----------------|--------------------------------------------------------------------------|
| Calculation Type     | RUN_TYPE           | CELL_OPT        | simultaneously optimizes atomic positions and the unit cell              |
| Convergence Criteria | MAX_DR             | 1.0E-4          | Convergence threshold for maximum atomic displacement                    |
|                      | MAX_FORCE          | 1.0E-3          | Convergence threshold for maximum force on atoms                         |
|                      | RMS_DR             | 1.0E-4          | Convergence threshold for root mean square (RMS) of atomic displacements |
|                      | RMS_FORCE          | 1.0E-3          | Convergence threshold for RMS of forces on atoms                         |
| Optimization Control | MAX_ITER           | 500             | Maximum number of geometry optimization iterations                       |
|                      | PRESSURE_TOLERANCE | 100.0           | Pressure convergence tolerance (unit:                                    |

| Parameter Category | Parameter Name            | Parameter Value | Description                                              |
|--------------------|---------------------------|-----------------|----------------------------------------------------------|
|                    |                           |                 | bar)                                                     |
| Calculation Method | METHOD                    | Quickstep       | CP2K's hybrid Gaussian and plane-wave method             |
|                    | METHOD                    | xTB             | Extended Tight-Binding Density Functional Theory         |
|                    | DISPERSION_PARAMETER_FILE | dftd3.dat       | Enables DFT-D3 dispersion correction                     |
| k-point Settings   | KPOINTS SCHEME            | 3×3×3           | k-point grid scheme and density                          |
| SCF Settings       | EPS_SCF                   | 1.0E-6          | Self-Consistent Field (SCF) energy convergence criterion |
|                    | SCF_GUESS                 | ATOMIC          | Initial electron density guess based on atomic orbitals  |
|                    | MAX_SCF                   | 250             | Maximum number of iterations for a single SCF cycle      |
|                    | MIXING METHOD             | DIRECT_P_MIXING | Charge density mixing method                             |
|                    | MIXING ALPHA              | 0.3             | Charge density mixing parameter                          |

Table S4 The 100 molecules selected for crystal structure prediction.

| name   | SMILES                                                    | name   | SMILES                                                        |
|--------|-----------------------------------------------------------|--------|---------------------------------------------------------------|
| out11  | <chem>n12nc(N)nc1nc(N(=O)=O)c(N)c2N(=O)=O</chem>          | out396 | <chem>n12[n+][([O-])c(N(=O)=O)nc1ncc(N(=O)=O)c2N</chem>       |
| out45  | <chem>n12nc(N(=O)=O)nc1cc(N(=O)=O)c(N)c2N(=O)=O</chem>    | out397 | <chem>n12nc(N(=O)=O)cc1[n+][([O-])nc(N)c2N(=O)=O</chem>       |
| out47  | <chem>c12c(N(=O)=O)c[n+][([O-])c1n[nH]c(N)n2</chem>       | out401 | <chem>n12c(N(=O)=O)c(N)nc1c(N(=O)=O)c[n+][([O-])n2</chem>     |
| out81  | <chem>c12[n+][([O-])cc(N(=O)=O)c1n[nH]c(N)n2</chem>       | out402 | <chem>n12cnc(N(=O)=O)c1n[n+][([O-])c(N)c2N(=O)=O</chem>       |
| out85  | <chem>c12n[nH]cc1c(N(=O)=O)nc(N(=O)=O)n2</chem>           | out406 | <chem>n12c(N(=O)=O)c(N)nc1c(N(=O)=O)nc(N(=O)=O)c2</chem>      |
| out86  | <chem>n12c(N)c(N(=O)=O)cc1nc(N(=O)=O)mn2</chem>           | out417 | <chem>n12cnc(N(=O)=O)c1n[n+][([O-])c(N)c2N</chem>             |
| out87  | <chem>n12c(N(=O)=O)c(N)nc1c(N(=O)=O)cc(N(=O)=O)n2</chem>  | out432 | <chem>n12ncc(N(=O)=O)c1n[n+][([O-])c(N(=O)=O)c2N</chem>       |
| out94  | <chem>c12[nH]cc(N(=O)=O)c1nnc(N(=O)=O)n2</chem>           | out435 | <chem>n12c(N(=O)=O)cnc1c(N(=O)=O)nncc2N</chem>                |
| out99  | <chem>n12c(N(=O)=O)cnc1c(N(=O)=O)c(N)mn2</chem>           | out444 | <chem>n12c(N(=O)=O)cnc1c(N(=O)=O)c(N)[n+][([O-])n2</chem>     |
| out102 | <chem>n12ncc(N(=O)=O)c1nc(N(=O)=O)c(N)c2N(=O)=O</chem>    | out448 | <chem>c12[nH]nc(N(=O)=O)c1[n+][([O-])cc(N(=O)=O)n2</chem>     |
| out106 | <chem>n12n[n+][([O-])nc1cc(N(=O)=O)c(N)c2N(=O)=O</chem>   | out449 | <chem>n12c(N(=O)=O)enc1c(N(=O)=O)n[n+][([O-])c2N</chem>       |
| out107 | <chem>n12nc(N(=O)=O)cc1nc(N(=O)=O)c(N)c2N(=O)=O</chem>    | out458 | <chem>n12[n+][([O-])nc(N(=O)=O)c1cc(N(=O)=O)c(N)c2N</chem>    |
| out111 | <chem>n12nn[n+][([O-])c1cc(N(=O)=O)c(N)c2N(=O)=O</chem>   | out459 | <chem>n12c(N(=O)=O)cnc1c(N(=O)=O)c(N)c(N(=O)=O)n2</chem>      |
| out114 | <chem>c12[n+][([O-])cc(N(=O)=O)c1[nH]nc(N(=O)=O)n2</chem> | out481 | <chem>n12nnc(N(=O)=O)c1c(N)c(N(=O)=O)cc2N(=O)=O</chem>        |
| out117 | <chem>n12c(N)c(N(=O)=O)nc1c(N(=O)=O)cc(N(=O)=O)n2</chem>  | out494 | <chem>n12c(N(=O)=O)cc(N(=O)=O)c1[n+][([O-])nc(N)n2</chem>     |
| out118 | <chem>n12cnc(N(=O)=O)c1nc(N)nc2N(=O)=O</chem>             | out497 | <chem>n12c(N)[n+][([O-])nc1c(N(=O)=O)cc(N(=O)=O)n2</chem>     |
| out138 | <chem>c12nnc(N(=O)=O)c1n[nH]cc2N(=O)=O</chem>             | out507 | <chem>n12c(N(=O)=O)c(N)nc1c(N)[n+][([O-])[n+][([O-])c2</chem> |
| out146 | <chem>n12nnc(N(=O)=O)c1ncc(N(=O)=O)c2N</chem>             | out508 | <chem>n12ncc(N(=O)=O)c1nc(N(=O)=O)c(N)n2</chem>               |
| out157 | <chem>n12nnc(N(=O)=O)c1cc(N(=O)=O)c(N)c2N(=O)=O</chem>    | out514 | <chem>n12c[n+][([O-])c(N)c1n[n+][([O-])c(N)c2N(=O)=O</chem>   |
| out164 | <chem>n12ncc(N(=O)=O)c1n[n+][([O-])c(N)c2N(=O)=O</chem>   | out520 | <chem>c12[n+][([O-])c(N(=O)=O)cc1n[nH]c(N)n2</chem>           |
| out174 | <chem>n12c(N(=O)=O)[n+][([O-])cc1c(N)nc(N)n2</chem>       | out523 | <chem>n12c[n+][([O-])c(N(=O)=O)c1nc(N(=O)=O)c(N)n2</chem>     |
| out188 | <chem>n12nnc(N)c1c(N(=O)=O)cnc2N(=O)=O</chem>             | out525 | <chem>n12c(N(=O)=O)cnc1c(N)c(N(=O)=O)mn2</chem>               |
| out203 | <chem>n12c[n+][([O-])c(N(=O)=O)c1nc(N)nc2N(=O)=O</chem>   | out529 | <chem>n12c(N(=O)=O)c(N)c(N(=O)=O)c1nn[n+][([O-])c2</chem>     |
| out214 | <chem>c12c(N(=O)=O)[n+][([O-])cc1n[nH]c(N)n2</chem>       | out531 | <chem>c12n[n+][([O-])c(N)c1n[nH]cc2N(=O)=O</chem>             |
| out230 | <chem>n12nnc1cc(N(=O)=O)c(N)c2N(=O)=O</chem>              | out534 | <chem>n12c(N)c(N(=O)=O)cc1nc(N(=O)=O)n[n+][2[O-]</chem>       |
| out238 | <chem>n12nc(N(=O)=O)cc1n[n+][([O-])c(N)c2N(=O)=O</chem>   | out541 | <chem>c12c[n+][([O-])c(N(=O)=O)c1n[nH]c(N)n2</chem>           |
| out242 | <chem>n12nc(N(=O)=O)c(N)c1cc(N(=O)=O)c(N)c2N(=O)=O</chem> | out569 | <chem>c12[nH]cc(N(=O)=O)c1[n+][([O-])nc(N(=O)=O)n2</chem>     |

|        |                                                |        |                                                |
|--------|------------------------------------------------|--------|------------------------------------------------|
| out244 | n12[n+][[O-]]nc(N(=O)=O)c1nc(N)c(N(=O)=O)c2    | out570 | n12c(N)[n+][[O-]]c(N(=O)=O)c1nc(N)c(N(=O)=O)c2 |
| out245 | n12[n+][[O-]]nc(N(=O)=O)c1ncc(N(=O)=O)c2N      | out571 | n12[n+][[O-]]c(N(=O)=O)nc1cc(N(=O)=O)c(N)c2N   |
| out247 | n12n[n+][[O-]]nc1c(N)c(N(=O)=O)cc2N(=O)=O      | out578 | n12[n+][[O-]][n+][[O-]]c(N)c1ncc(N(=O)=O)c2N   |
| out254 | c12nc(N(=O)=O)nc1n[nH]cc2N(=O)=O               | out582 | n12nc(N)nc1c(N(=O)=O)cc(N(=O)=O)[n+][2][O-]    |
| out255 | n12nnc1c(N(=O)=O)c(N)c(N(=O)=O)c2              | out583 | n12c(N(=O)=O)nc(N(=O)=O)c1nc(N)c(N(=O)=O)c2    |
| out264 | n12c(N(=O)=O)c(N)nc1cc(N(=O)=O)nn2             | out586 | n12c[n+][[O-]]nc1c(N(=O)=O)c(N)nc2N(=O)=O      |
| out271 | n12c(N(=O)=O)nc(N(=O)=O)c1ncc(N(=O)=O)c2N      | out587 | n12cc(N(=O)=O)nc1nc(N(=O)=O)c(N)c2N(=O)=O      |
| out274 | n12c(N(=O)=O)cc(N(=O)=O)c1nc(N)nn2             | out594 | n12nnc(N)c1c(N(=O)=O)nc2N(=O)=O                |
| out276 | c12n[n+][[O-]]c(N(=O)=O)c1n[nH]cc2N(=O)=O      | out597 | n12nc(N(=O)=O)cc1c(N(=O)=O)nc(N)c2N(=O)=O      |
| out279 | n12c(N(=O)=O)c(N)cc1nc(N(=O)=O)nn2             | out601 | n12cnc(N(=O)=O)c1nc(N(=O)=O)c(N)c2N(=O)=O      |
| out281 | n12cc(N(=O)=O)nc1n[n+][[O-]]c(N)c2N(=O)=O      | out603 | n12n[n+][[O-]]c(N)c1c(N)c(N(=O)=O)cc2N(=O)=O   |
| out287 | n12ncc(N(=O)=O)c1nnc(N(=O)=O)c2N               | out624 | n12cc(N(=O)=O)nc1c(N(=O)=O)nc(N)c2N(=O)=O      |
| out296 | n12c(N)cc(N(=O)=O)c1nc(N(=O)=O)nn2             | out625 | n12c(N(=O)=O)cc(N(=O)=O)c1nc(N(=O)=O)nc2N      |
| out305 | c12c(N(=O)=O)cnc1[nH]nc(N(=O)=O)n2             | out629 | n12nc(N(=O)=O)nc1c[n+][[O-]]c(N)c2N(=O)=O      |
| out318 | n12c(N(=O)=O)cc(N(=O)=O)c1nc(N)c(N(=O)=O)n2    | out634 | n12cc(N(=O)=O)nc1nnc(N(=O)=O)c2N               |
| out330 | n12c[n+][[O-]]c(N(=O)=O)c1nc(N)c(N(=O)=O)c2N   | out655 | n12nnc(N(=O)=O)c1c[n+][[O-]]c(N)c2N(=O)=O      |
| out353 | n12c(N)c(N(=O)=O)nc1c(N(=O)=O)cc(N)[n+][2][O-] | out669 | c12cc(N(=O)=O)[n+][[O-]]c1n[nH]c(N)n2          |
| out360 | n12n[n+][[O-]]c(N)c1cc(N(=O)=O)c(N)c2N(=O)=O   | out670 | n12nc(N(=O)=O)nc1c(N)c(N(=O)=O)cc2N(=O)=O      |
| out373 | n12c(N(=O)=O)c(N)nc1c(N(=O)=O)n[n+][[O-]]c2    | out673 | n12c[n+][[O-]]c(N)c1nc(N(=O)=O)nc2N(=O)=O      |
| out374 | n12cnc(N(=O)=O)c1nc(N(=O)=O)c(N)n2             | out674 | c12nc(N(=O)=O)[n+][[O-]]c1n[nH]cc2N(=O)=O      |
| out386 | n12c(N(=O)=O)[n+][[O-]]cc1c(N(=O)=O)nc(N)n2    | out685 | n12ncc(N(=O)=O)c1nnc(N)c2N(=O)=O               |
| out390 | n12c(N(=O)=O)cc(N(=O)=O)c1nc(N(=O)=O)c(N)n2    | out688 | n12c(N(=O)=O)[n+][[O-]]c(N(=O)=O)c1nc(N)nc2    |
| out392 | n12n[n+][[O-]]c(N(=O)=O)c1ncc(N(=O)=O)c2N      | out693 | n12cc(N(=O)=O)nc1c(N(=O)=O)nnc2N               |

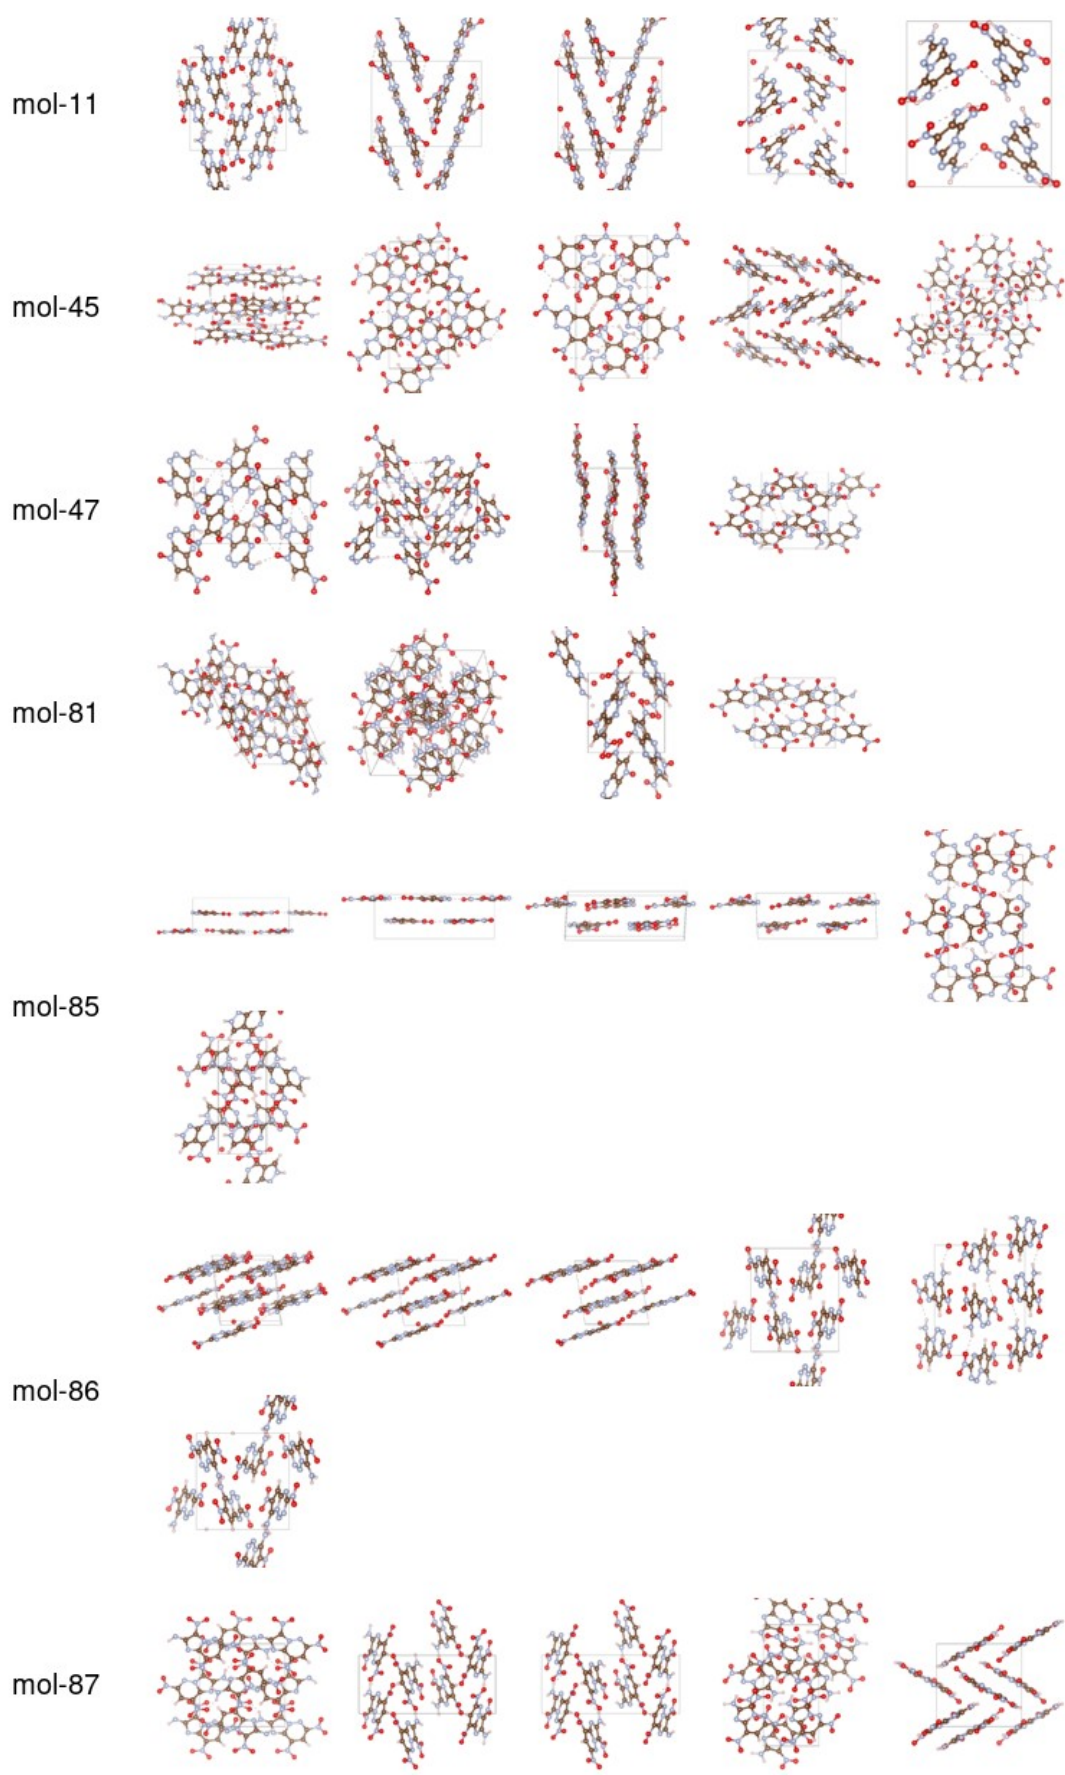

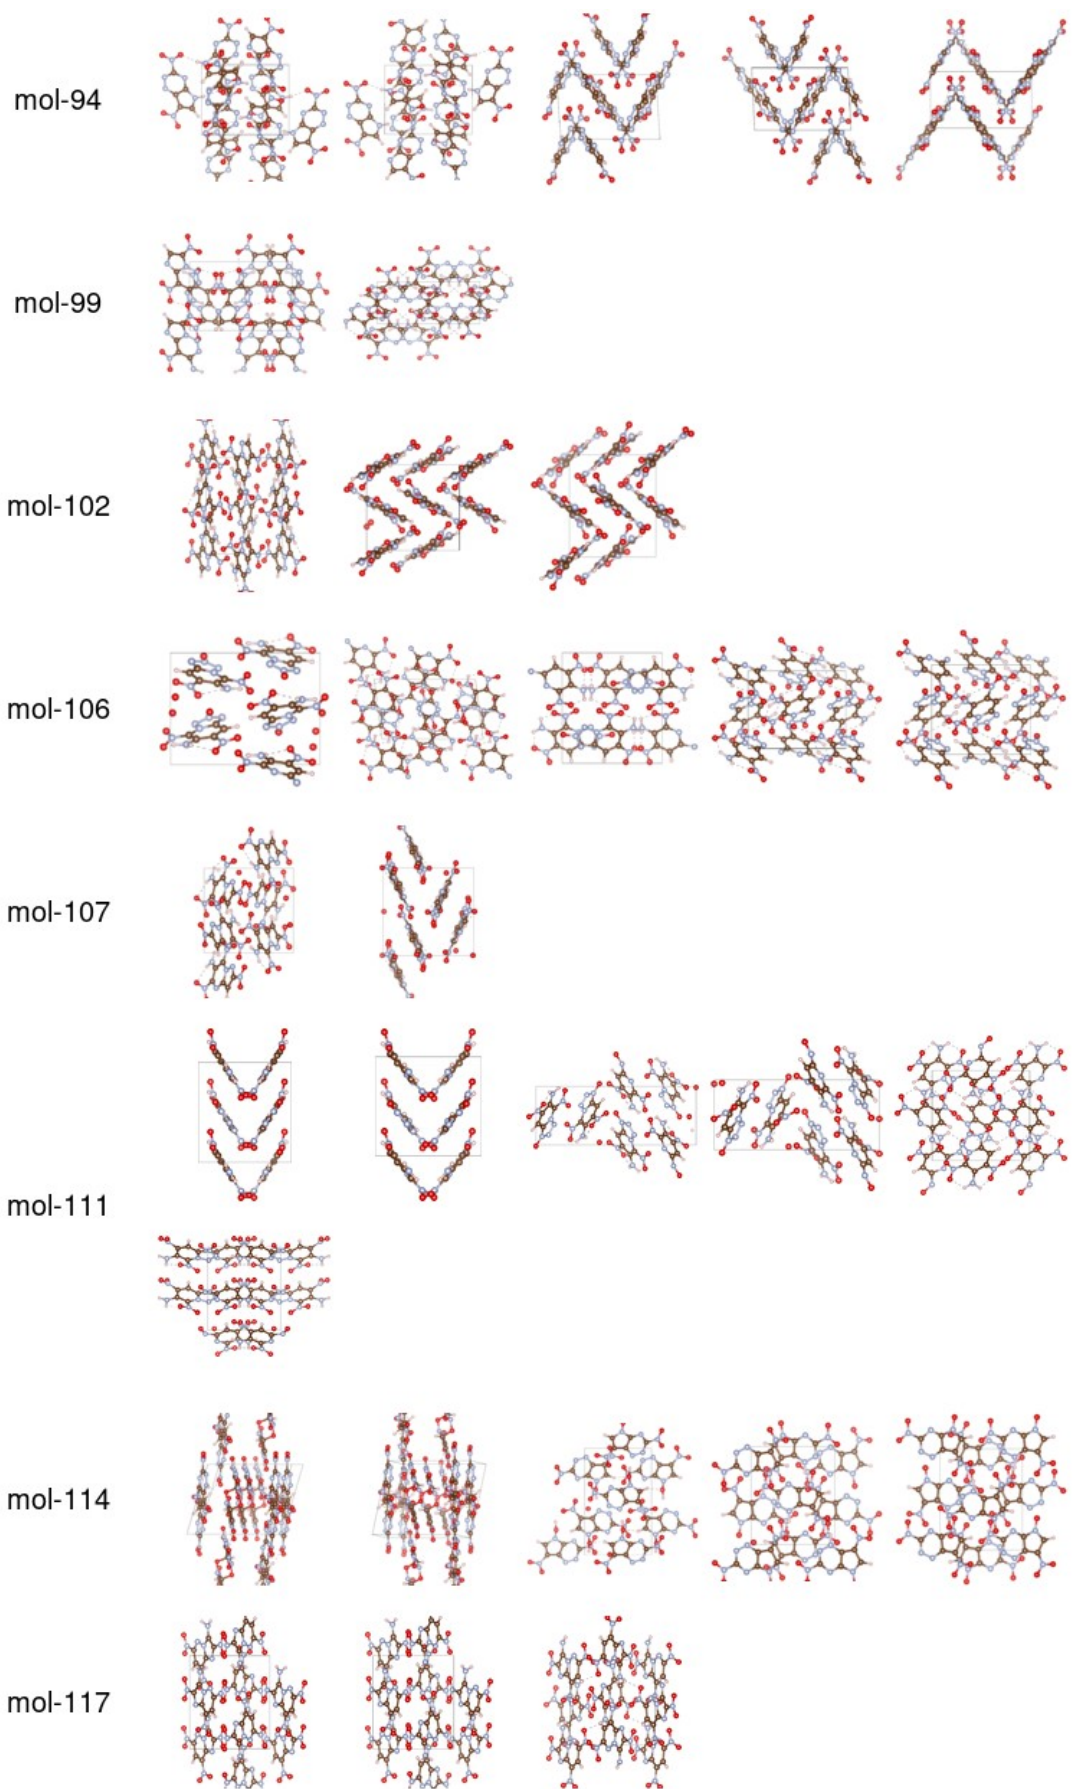

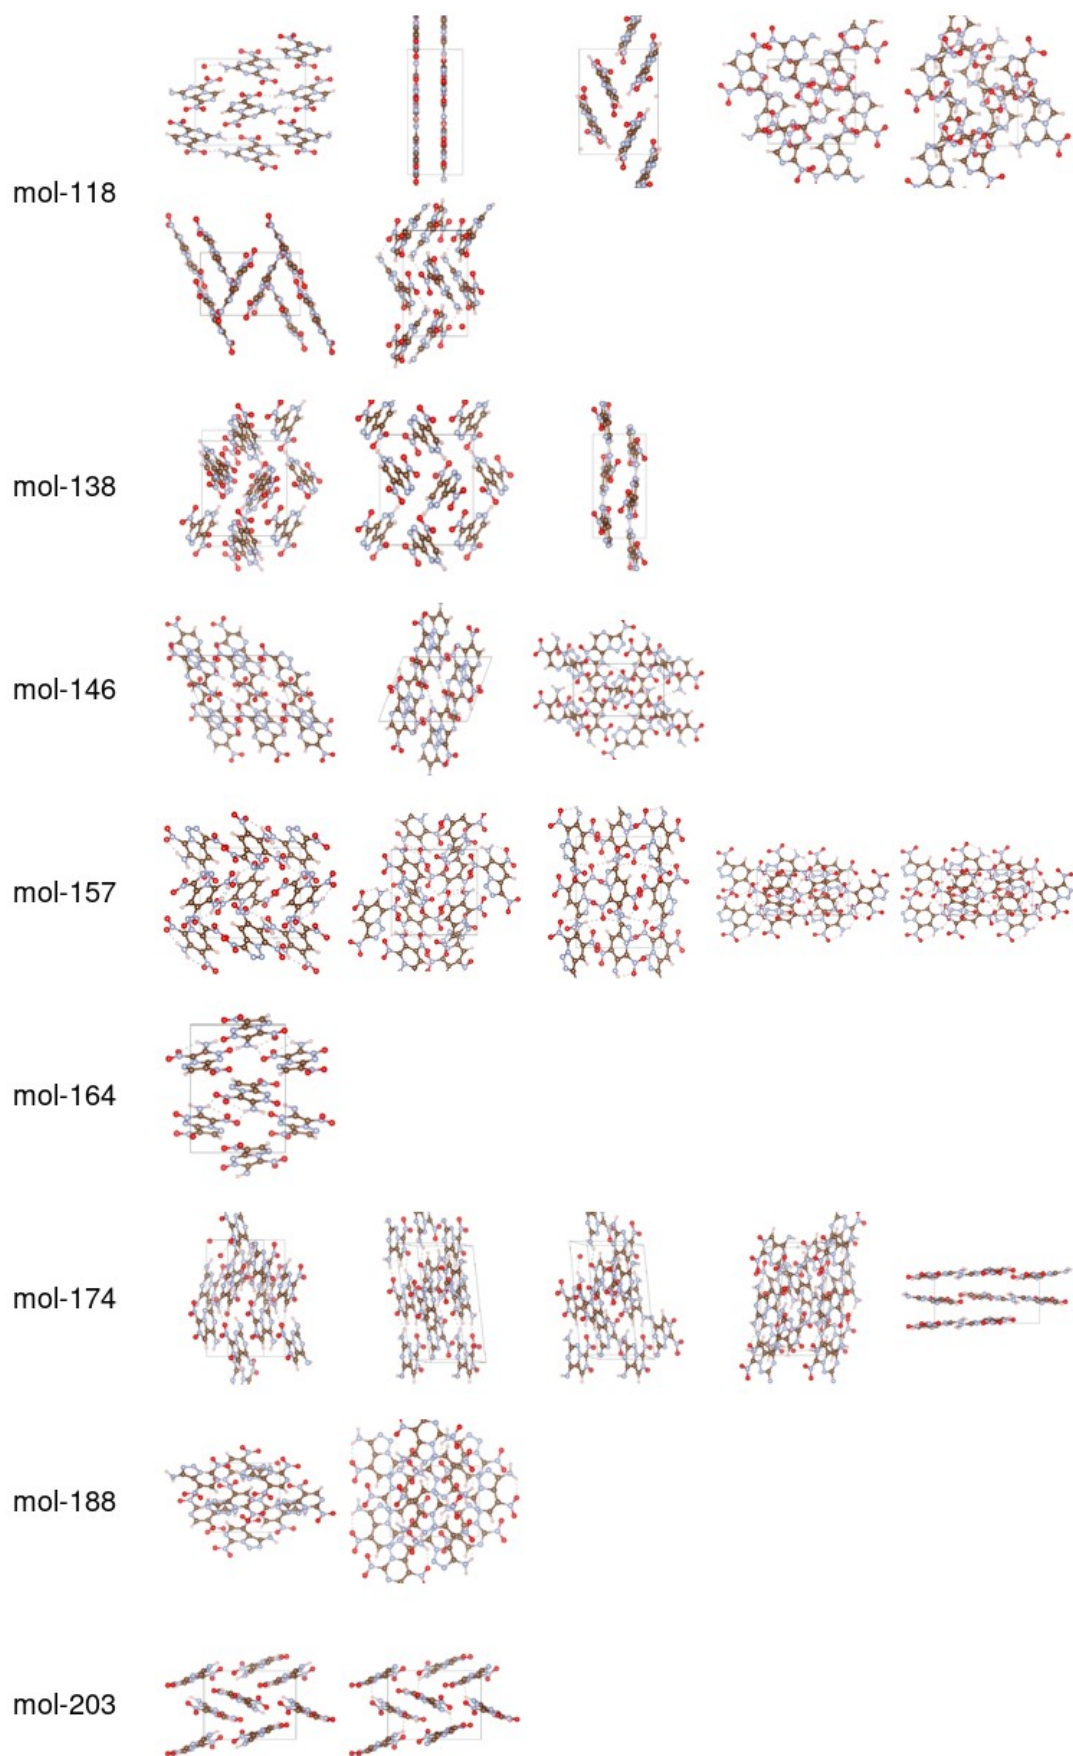

mol-214

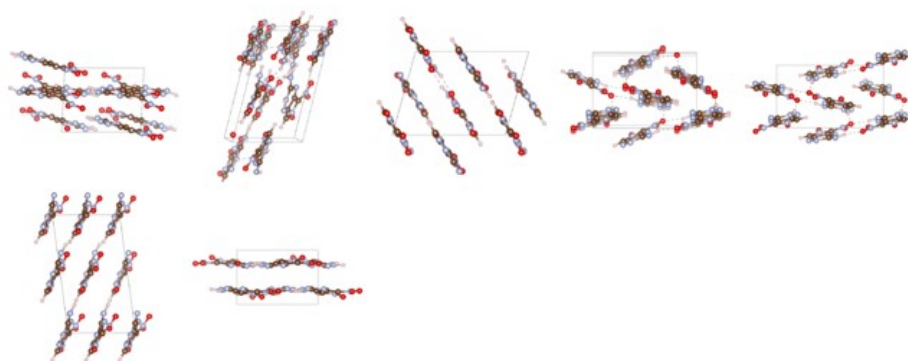

mol-230

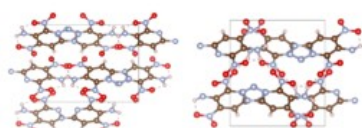

mol-238

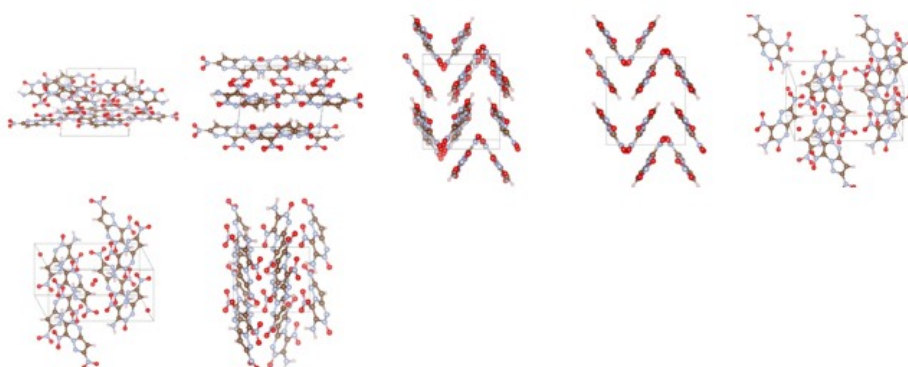

mol-242

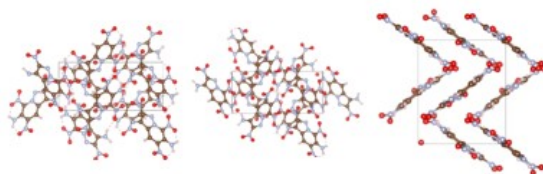

mol-244

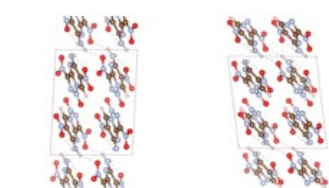

mol-245

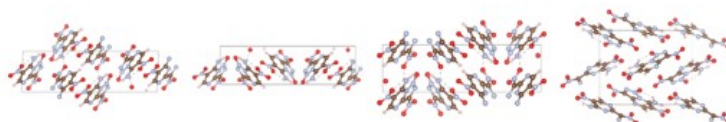

mol-247

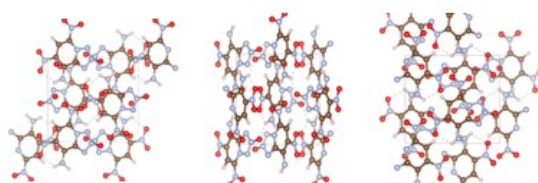

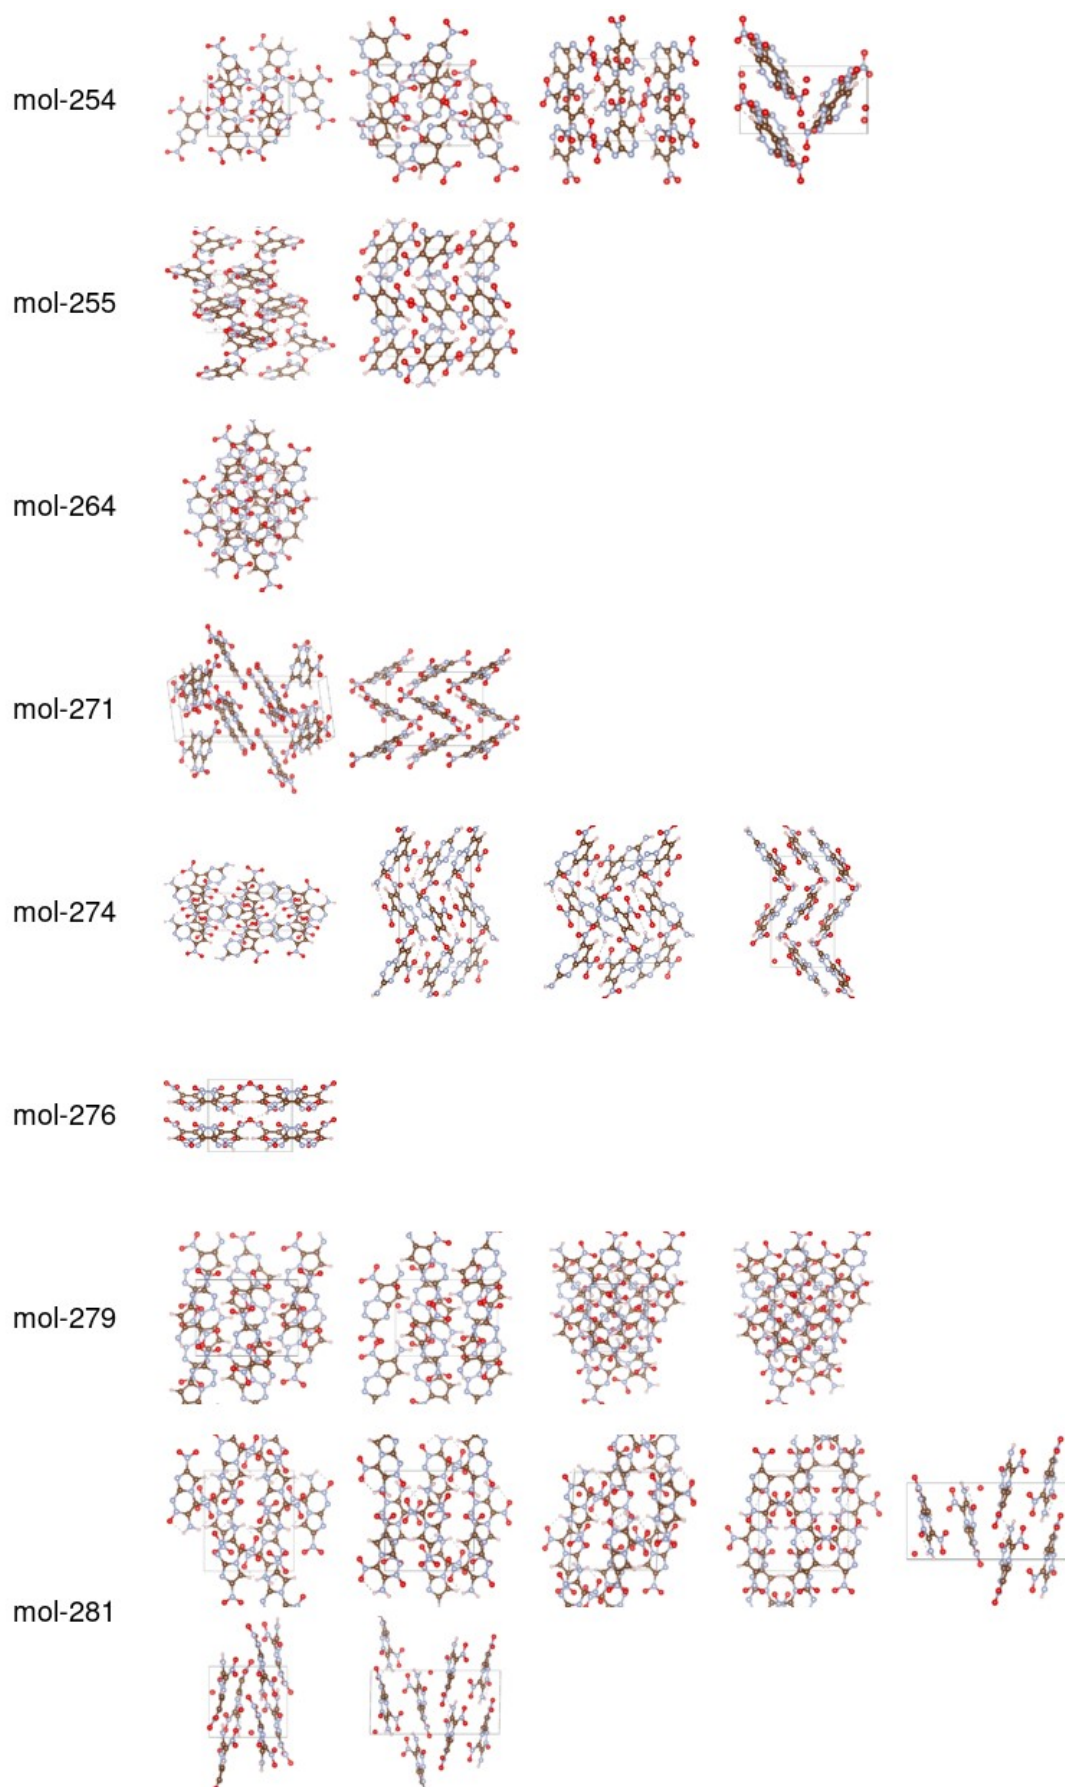

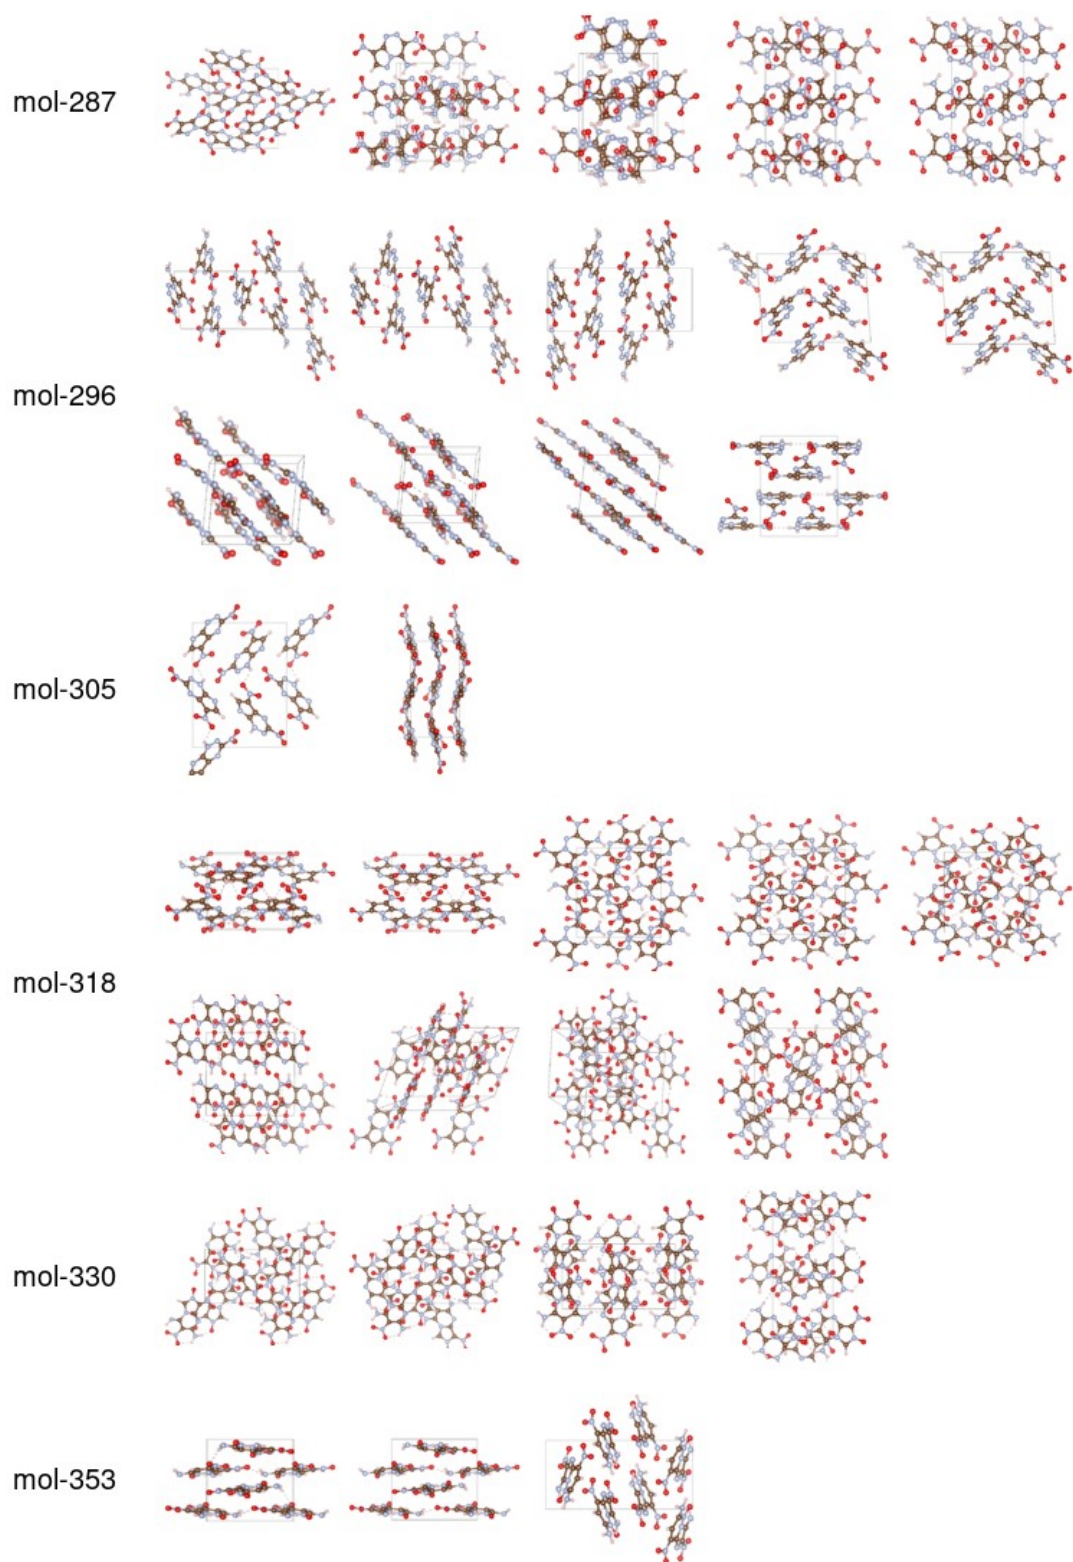

mol-360

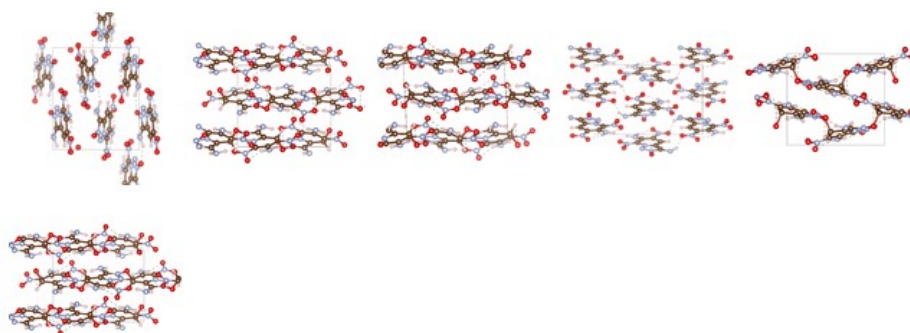

mol-373

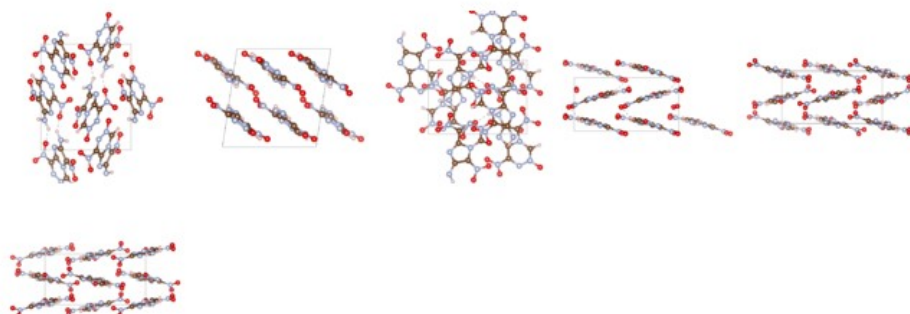

mol-374

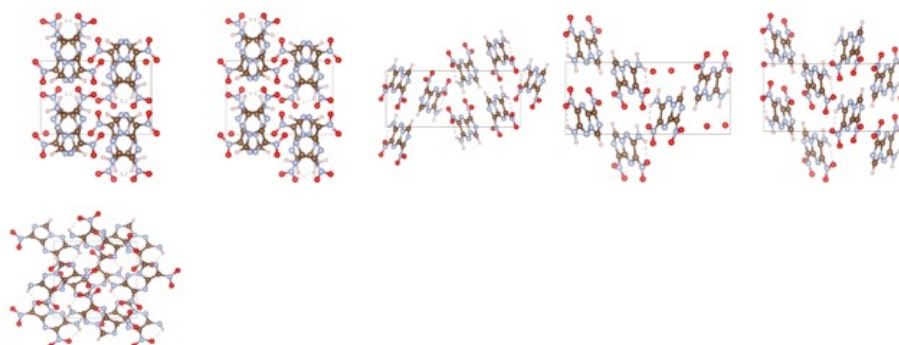

mol-386

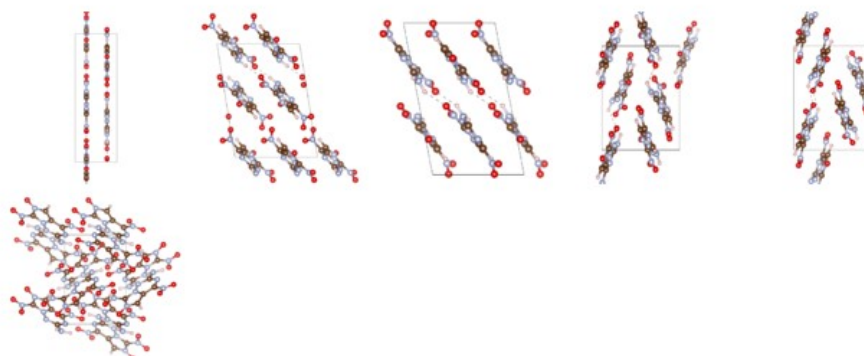

mol-390

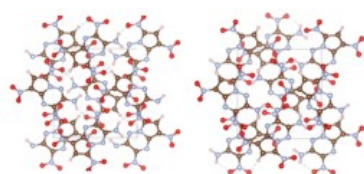

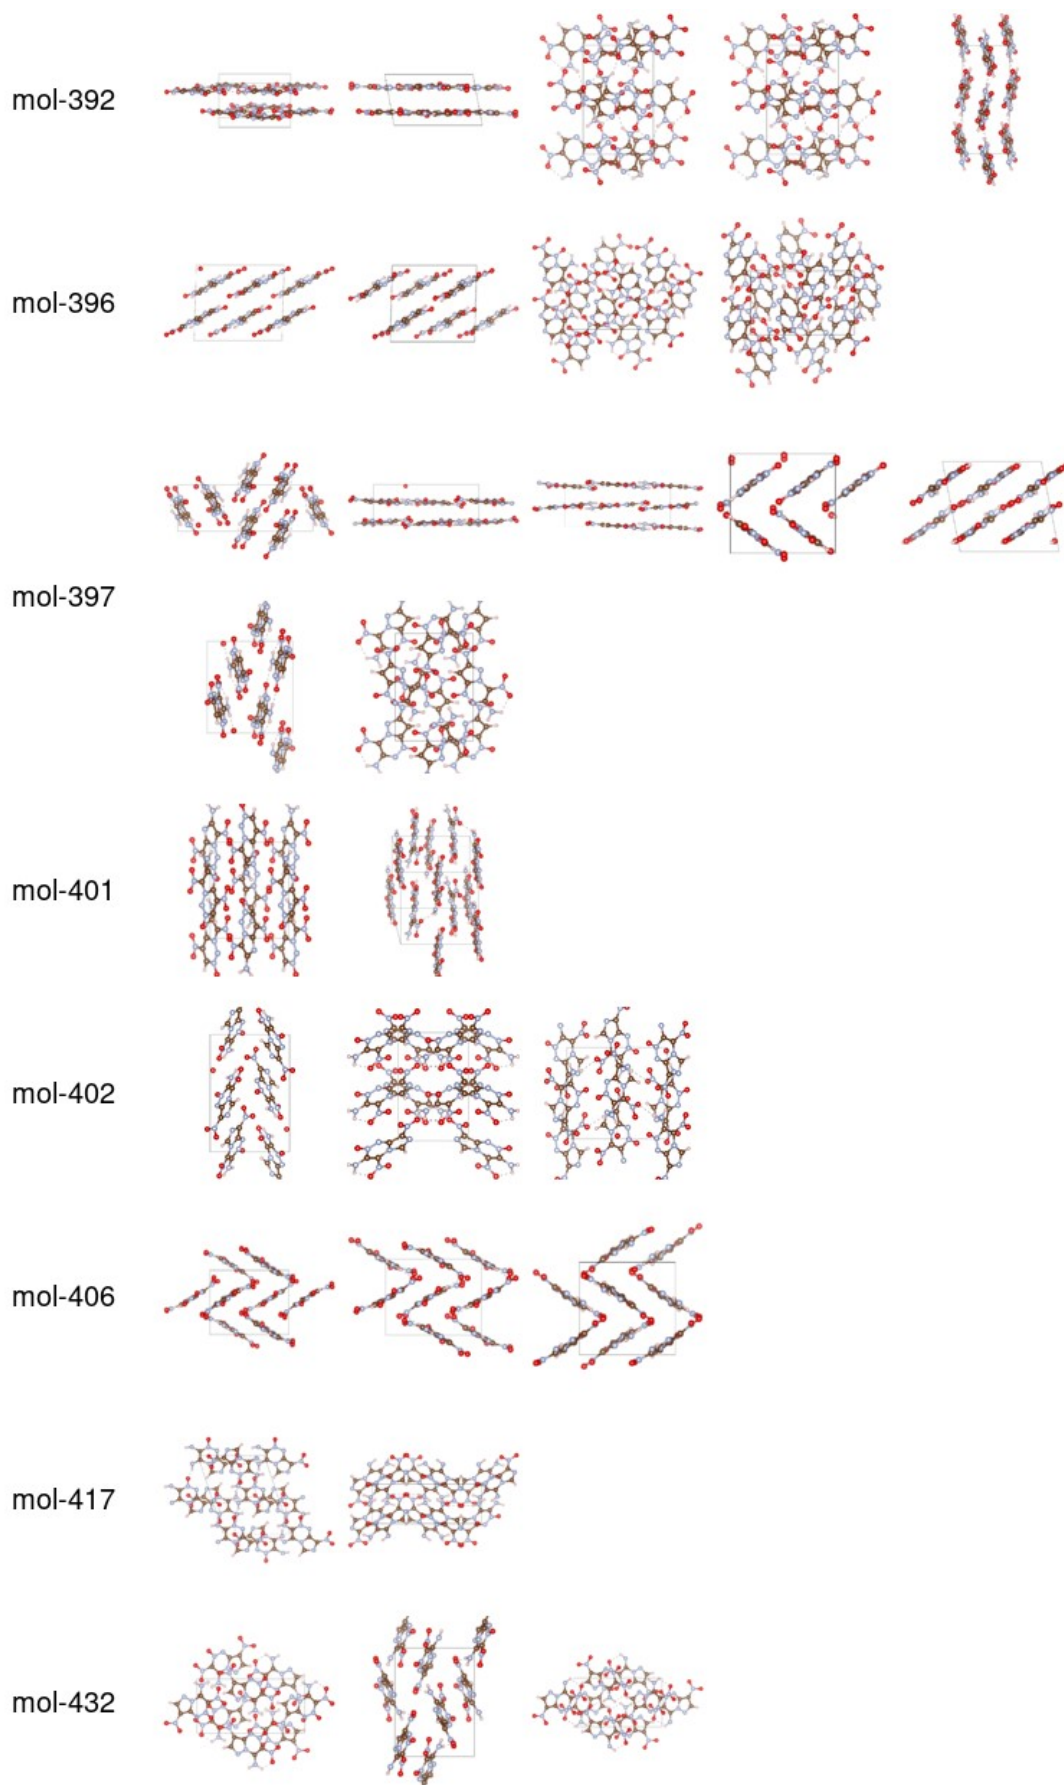

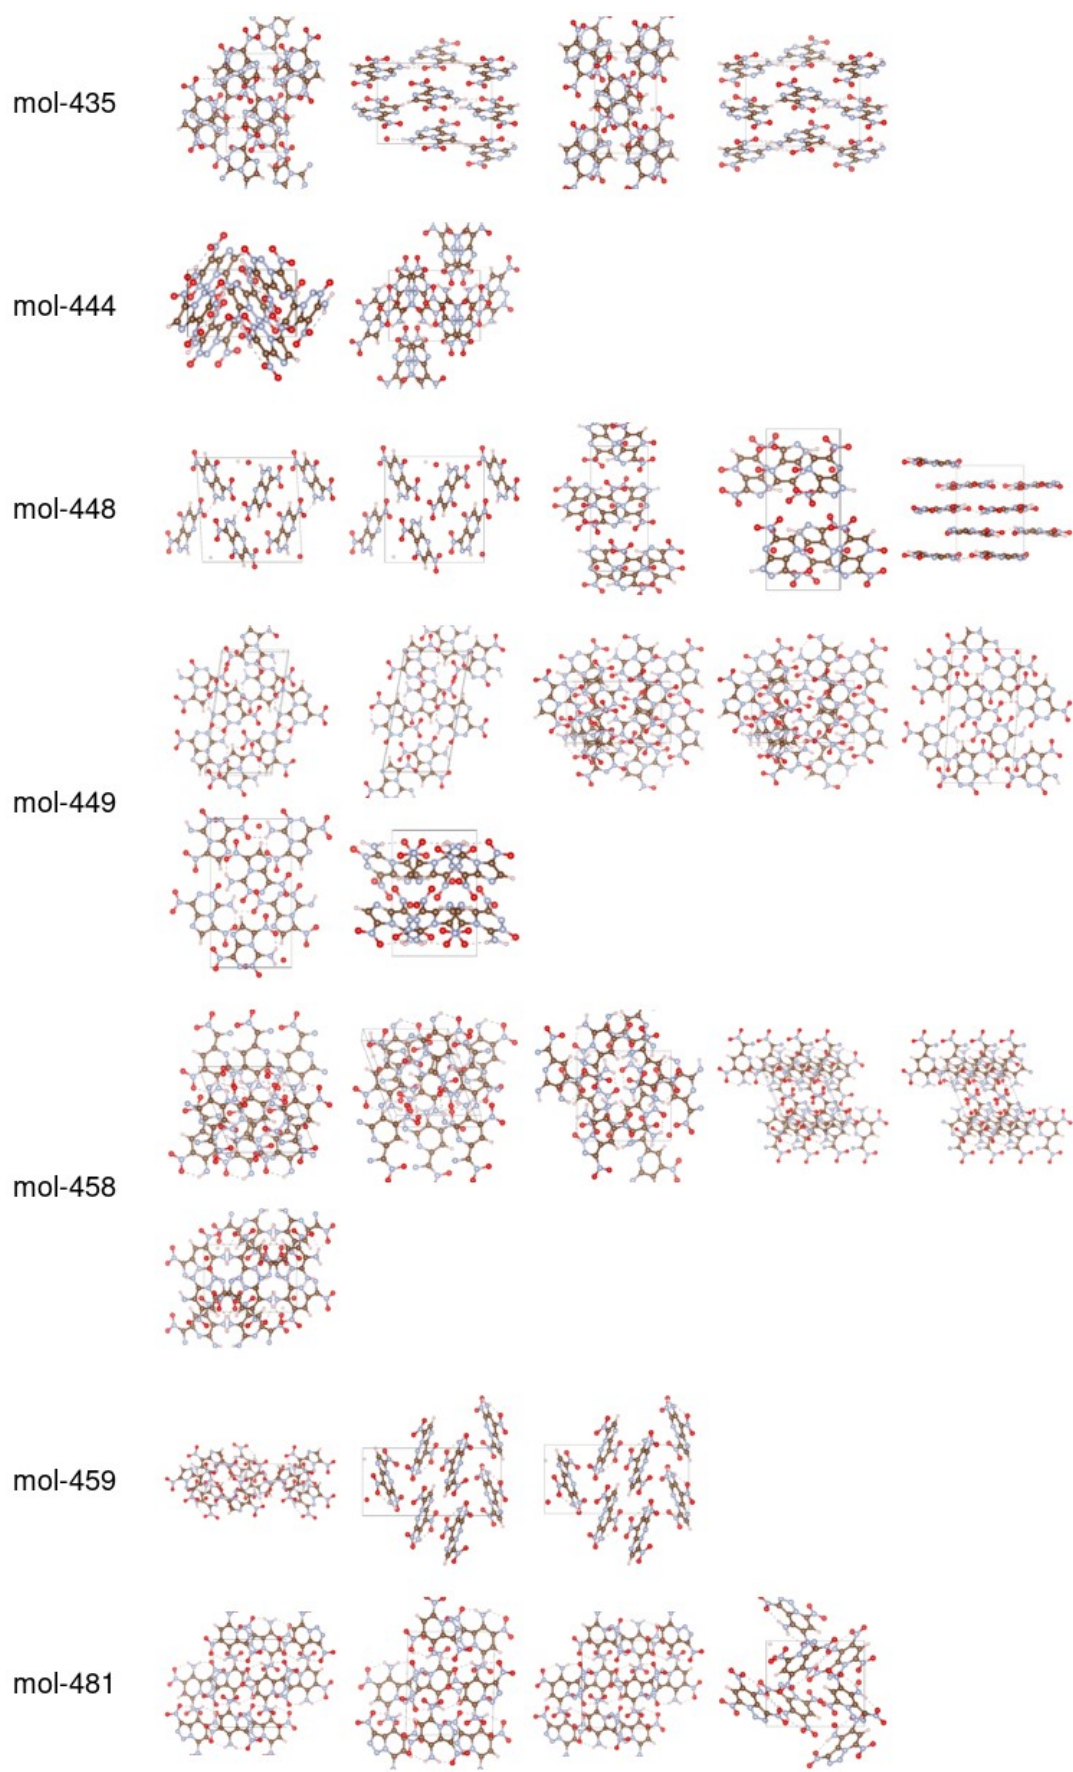

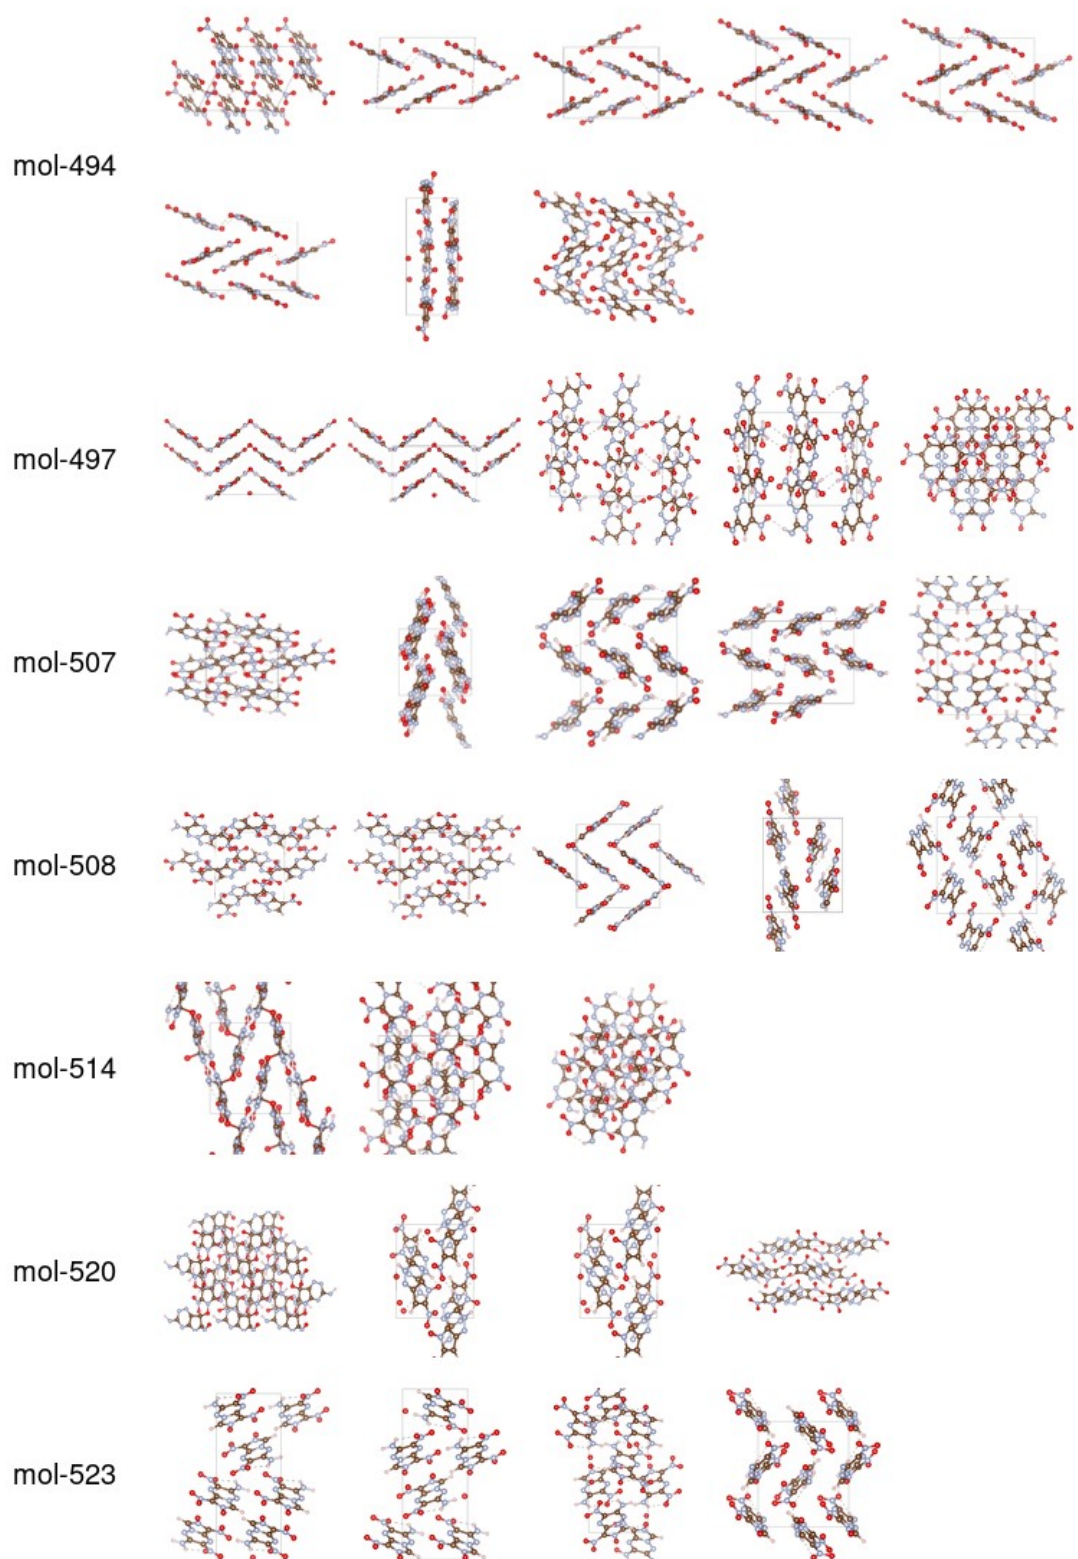

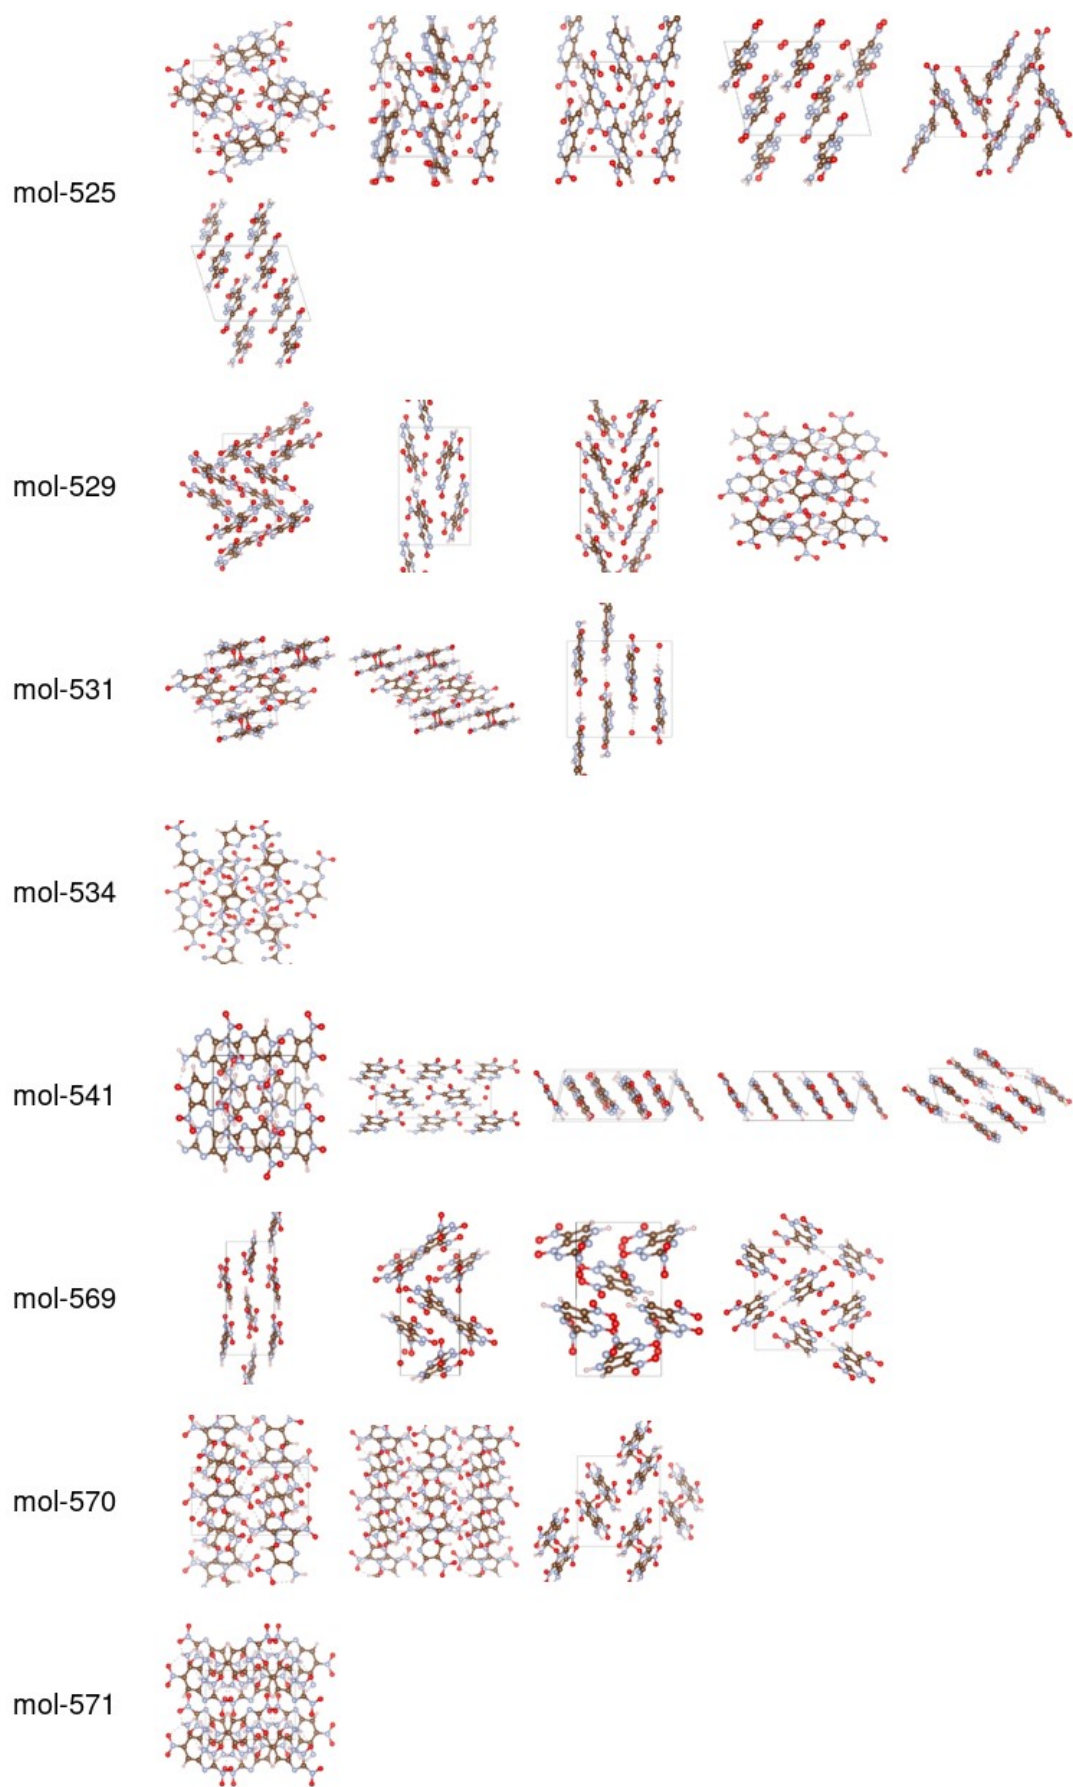

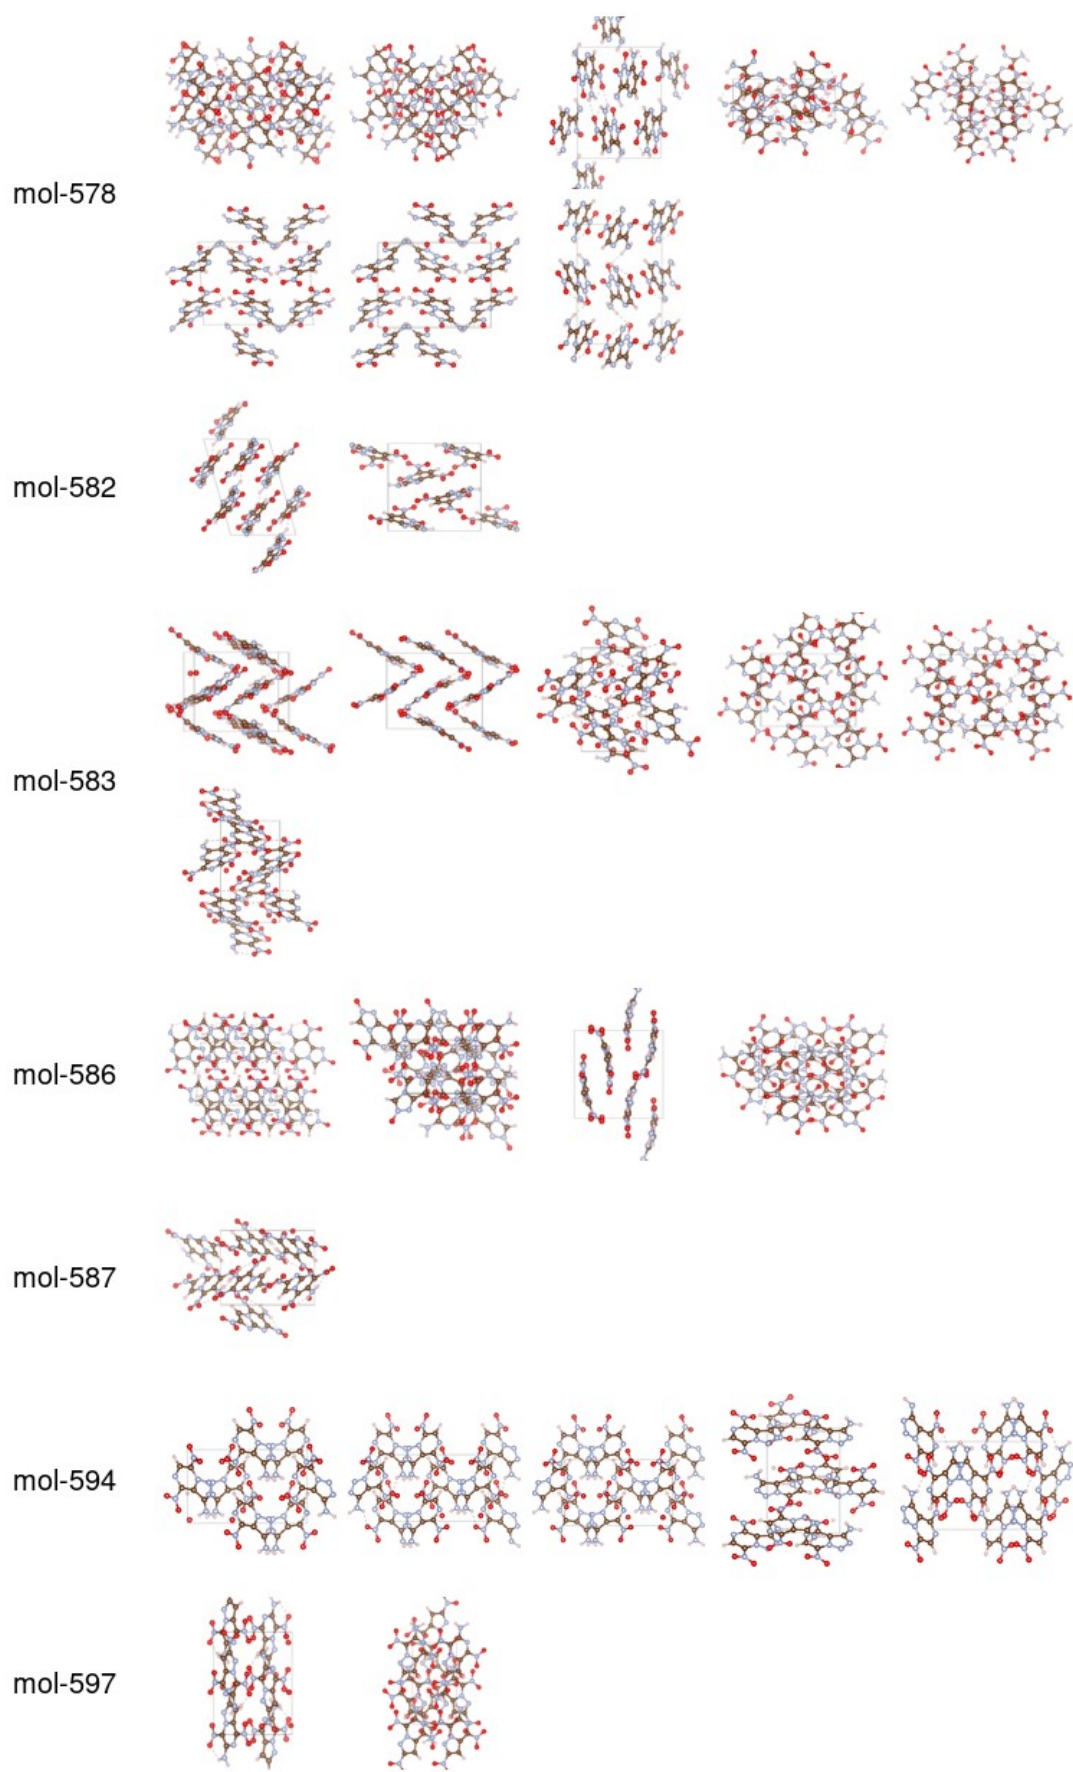

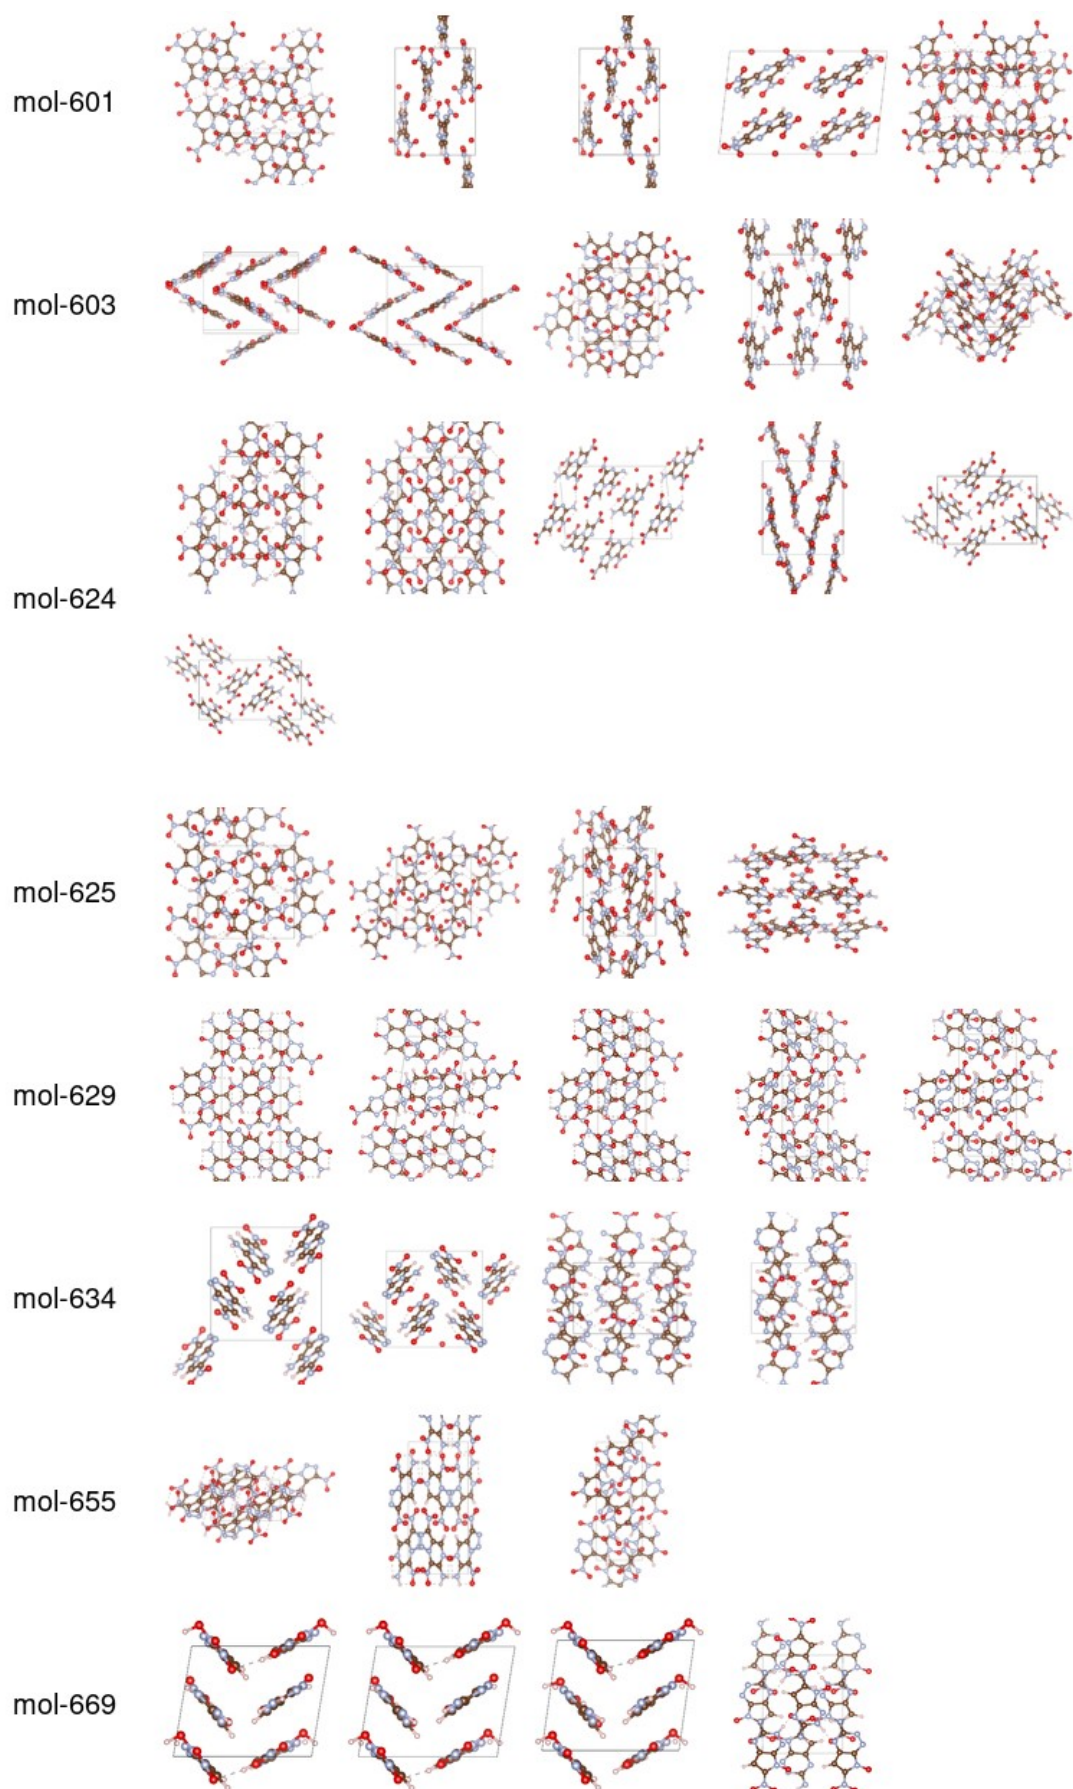

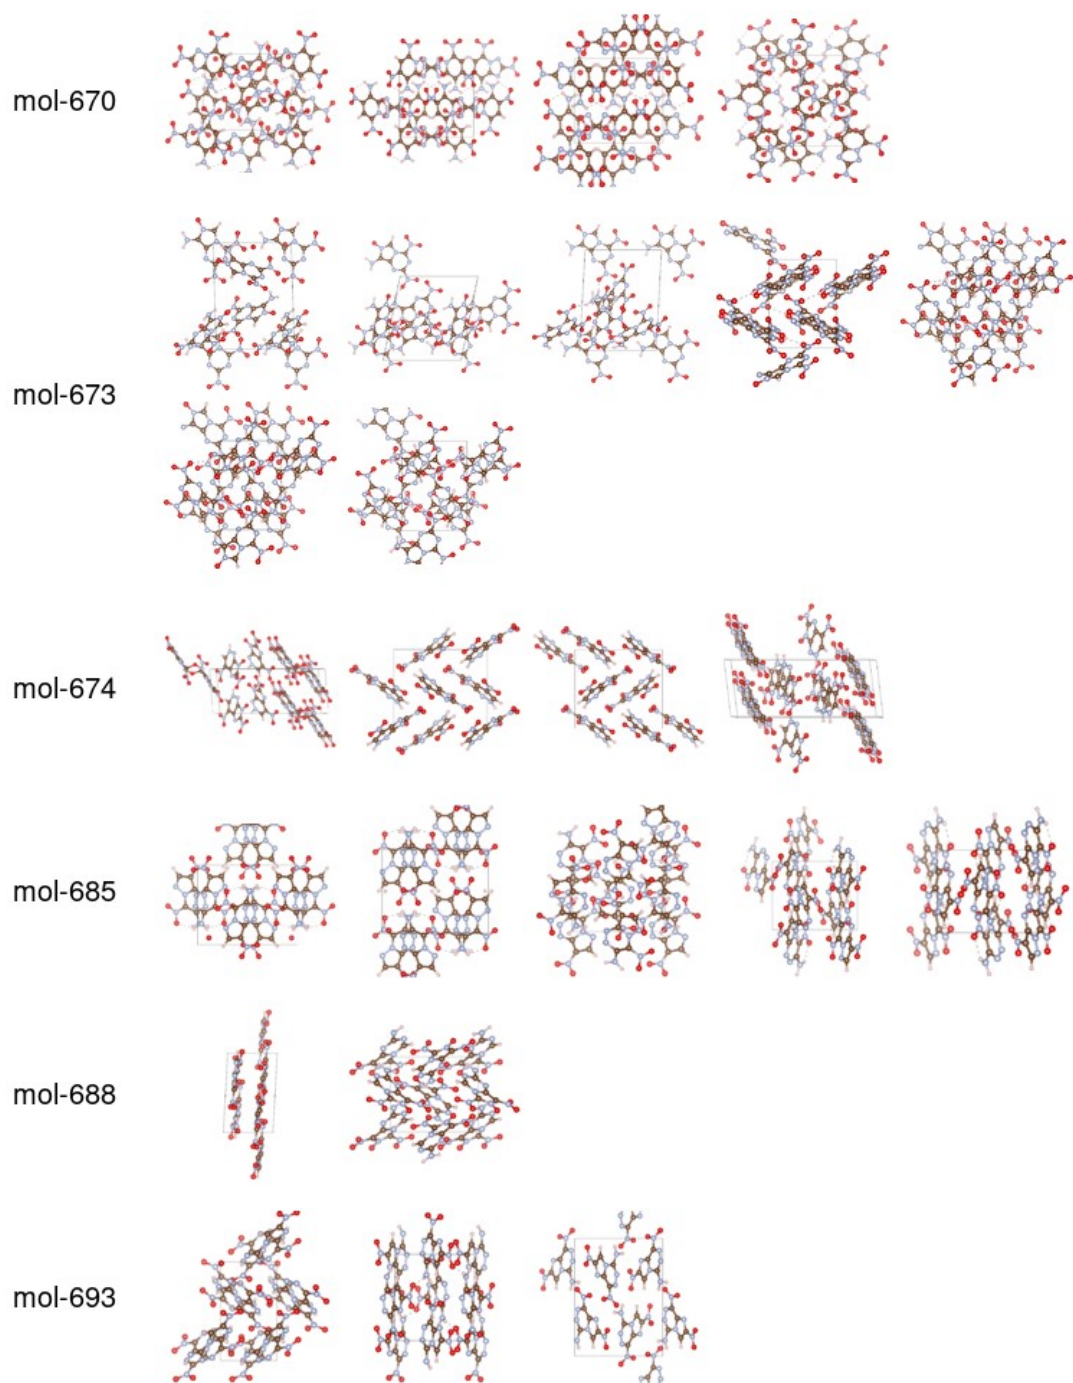

Figure S1 Predicted crystal structures of the 100 designed molecules from USPEX + xTB.

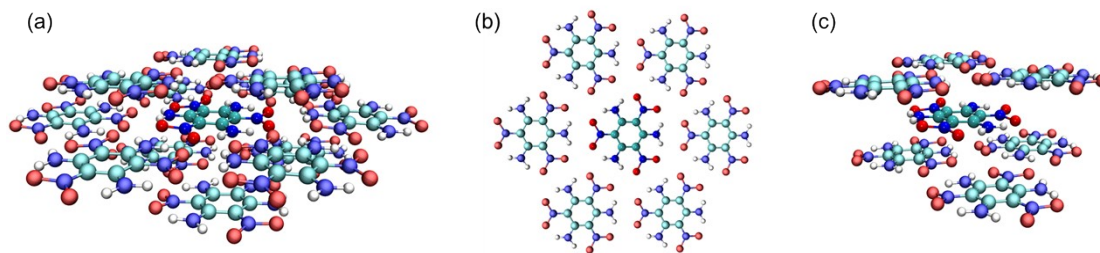

Figure S2 Fragment partitioning schemes for energy decomposition analysis: (a) overall; (b) intralayer; (c) interlayer.

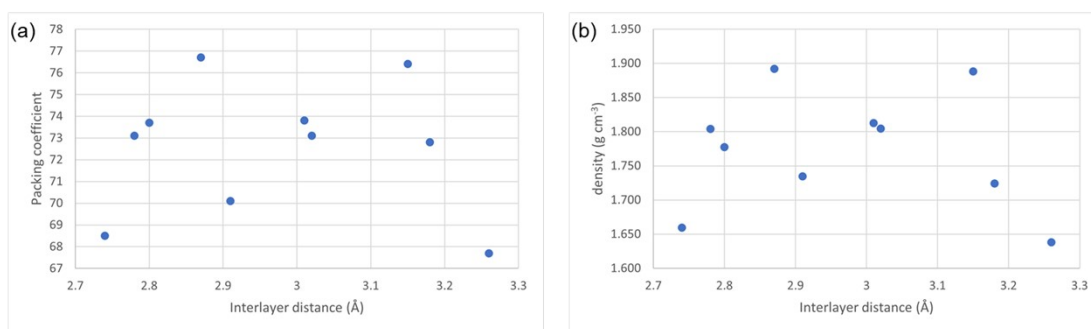

Figure S3 Scatter plots of interlayer spacing versus packing coefficient (a) and density (b).

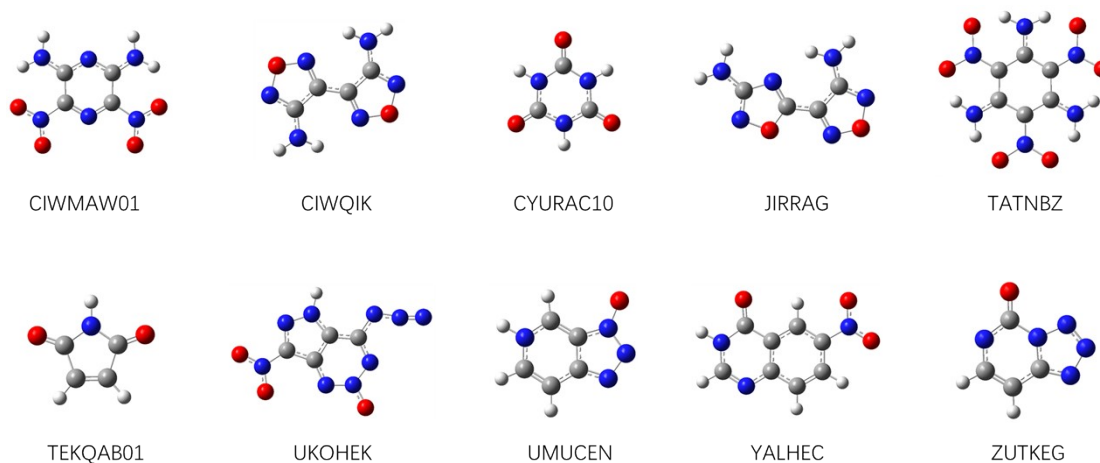

Figure S4 Energy decomposition analysis of intermolecular interactions for ten reported planar layered stacking molecules.

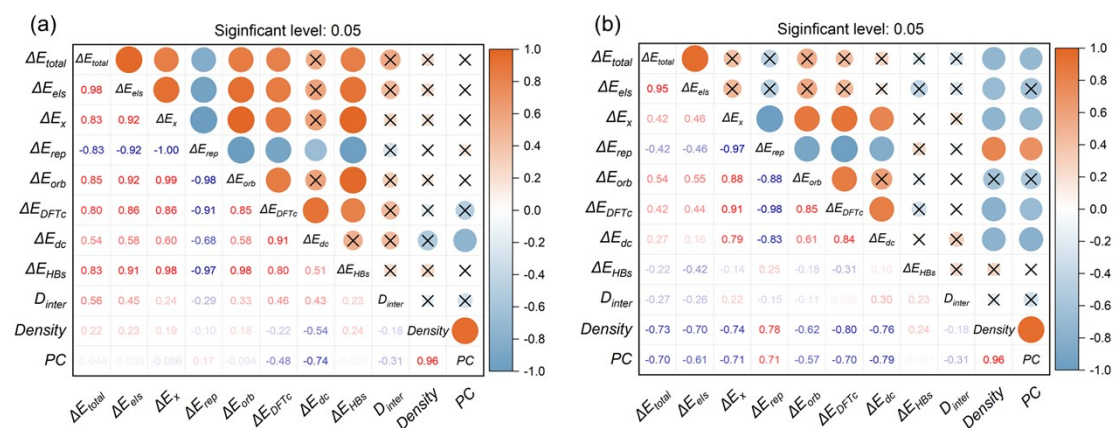

Figure S5 Correlation heat maps between density and intermolecular interaction energy decomposition terms for the Set-pl10: (a) intralayer intermolecular weak interactions; (b) interlayer weak interactions.

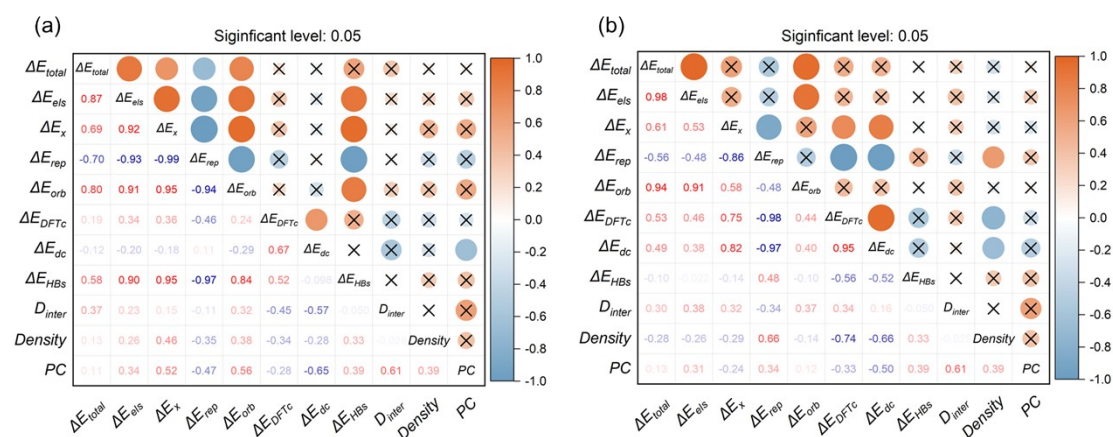

Figure S6 Correlation heat maps between density and intermolecular interaction energy decomposition terms for the ten reported molecules: (a) intralayer intermolecular weak interactions; (b) interlayer weak interactions.
